# Supplementary material for: Hemiacetalmeroterpenoids A–C and Astellolide Q with Antimicrobial Activity from the Marine-Derived Fungus Penicillium sp. N-5
Source: MDPI journal article supplement (doi:10.3390/md20080514), 2022-08-13
Supplement: s1 [file s1]

**Hemiacetalmeroterpenoids A-C and Astellolide Q with  
Antimicrobial Activity from the Marine-Derived Fungus  
*Penicillium* sp. N-5**

Tao Chen, Wencong Yang, Taobo Li, Yihao Yin, Yufeng Liu, Bo Wang \*,  
Zhigang She \*

School of Chemistry, Sun Yat-Sen University, Guangzhou 510275, China

\* Correspondence: ceswb@mail.sysu.edu.cn (B.W.); cesszhg@mail.sysu.edu.cn  
(Z.S.)

## Supporting information

|                                                                                                          |    |
|----------------------------------------------------------------------------------------------------------|----|
| <b>Figure S1.</b> HRESIMS spectrum of compound <b>1</b> .....                                            | 3  |
| <b>Figure S2.</b> <sup>1</sup> H NMR spectrum of compound <b>1</b> (600 MHz, CD <sub>3</sub> OD).....    | 3  |
| <b>Figure S3.</b> <sup>13</sup> C NMR spectrum of compound <b>1</b> (150 MHz, CD <sub>3</sub> OD).....   | 4  |
| <b>Figure S4.</b> DEPT135 spectrum of compound <b>1</b> (150 MHz, CD <sub>3</sub> OD) .....              | 4  |
| <b>Figure S5.</b> HSQC spectrum of compound <b>1</b> (CD <sub>3</sub> OD).....                           | 5  |
| <b>Figure S6.</b> H, H-COSY spectrum of compound <b>1</b> (CD <sub>3</sub> OD) .....                     | 5  |
| <b>Figure S7.</b> HMBC spectrum of compound <b>1</b> (CD <sub>3</sub> OD).....                           | 6  |
| <b>Figure S8.</b> NOE spectrum of compound <b>1</b> (CD <sub>3</sub> OD).....                            | 6  |
| <b>Figure S9.</b> HRESIMS spectrum of compound <b>2</b> .....                                            | 7  |
| <b>Figure S10.</b> <sup>1</sup> H NMR spectrum of compound <b>2</b> (600 MHz, CD <sub>3</sub> OD) .....  | 7  |
| <b>Figure S11.</b> <sup>13</sup> C NMR spectrum of compound <b>2</b> (150 MHz, CD <sub>3</sub> OD) ..... | 8  |
| <b>Figure S12.</b> DEPT135 spectrum of compound <b>2</b> (150 MHz, CD <sub>3</sub> OD).....              | 8  |
| <b>Figure S13.</b> HSQC spectrum of compound <b>2</b> (CD <sub>3</sub> OD) .....                         | 9  |
| <b>Figure S14.</b> H, H-COSY spectrum of compound <b>2</b> (CD <sub>3</sub> OD).....                     | 9  |
| <b>Figure S15.</b> HMBC spectrum of compound <b>2</b> (CD <sub>3</sub> OD) .....                         | 10 |
| <b>Figure S17.</b> HRESIMS spectrum of compound <b>3</b> .....                                           | 11 |
| <b>Figure S18.</b> <sup>1</sup> H NMR spectrum of compound <b>3</b> (600 MHz, CD <sub>3</sub> OD) .....  | 11 |
| <b>Figure S19.</b> <sup>13</sup> C NMR spectrum of compound <b>3</b> (150 MHz, CD <sub>3</sub> OD) ..... | 12 |
| <b>Figure S20.</b> HSQC spectrum of compound <b>3</b> (CD <sub>3</sub> OD) .....                         | 12 |
| <b>Figure S21.</b> H, H-COSY spectrum of compound <b>3</b> (CD <sub>3</sub> OD).....                     | 13 |
| <b>Figure S22.</b> HMBC spectrum of compound <b>3</b> (CD <sub>3</sub> OD) .....                         | 13 |
| <b>Figure S23.</b> NOE spectrum of compound <b>3</b> (CD <sub>3</sub> OD) .....                          | 14 |
| <b>Figure S24.</b> NOE spectrum of compound <b>14</b> (CD <sub>3</sub> OD) .....                         | 14 |
| <b>Figure S25.</b> HRESIMS spectrum of compound <b>15</b> .....                                          | 15 |
| <b>Figure S26.</b> <sup>1</sup> H NMR spectrum of compound <b>15</b> (400 MHz, CD <sub>3</sub> OD).....  | 15 |
| <b>Figure S27.</b> <sup>13</sup> C NMR spectrum of compound <b>15</b> (100 MHz, CD <sub>3</sub> OD)..... | 16 |
| <b>Figure S28.</b> DEPT135 spectrum of compound <b>15</b> (150 MHz, CD <sub>3</sub> OD) .....            | 16 |
| <b>Figure S29.</b> HSQC spectrum of compound <b>15</b> (CD <sub>3</sub> OD) .....                        | 17 |
| <b>Figure S30.</b> H, H-COSY spectrum of compound <b>15</b> (CD <sub>3</sub> OD) .....                   | 17 |
| <b>Figure S31.</b> HMBC spectrum of compound <b>15</b> (CD <sub>3</sub> OD).....                         | 18 |
| <b>Figure S32.</b> NOE spectrum of compound <b>15</b> (CD <sub>3</sub> OD) .....                         | 18 |
| <b>Figure S33.</b> UV and ECD of compound <b>1</b> (CD <sub>3</sub> OD) .....                            | 19 |
| <b>Figure S34.</b> UV and ECD of compound <b>2</b> (CD <sub>3</sub> OD) .....                            | 19 |
| <b>Figure S35.</b> UV and ECD of compound <b>3</b> (CD <sub>3</sub> OD) .....                            | 19 |
| <b>Figure S36.</b> UV and ECD of compound <b>14</b> (CD <sub>3</sub> OD) .....                           | 20 |
| <b>Figure S37.</b> UV and ECD of compound <b>15</b> (CD <sub>3</sub> OD) .....                           | 20 |

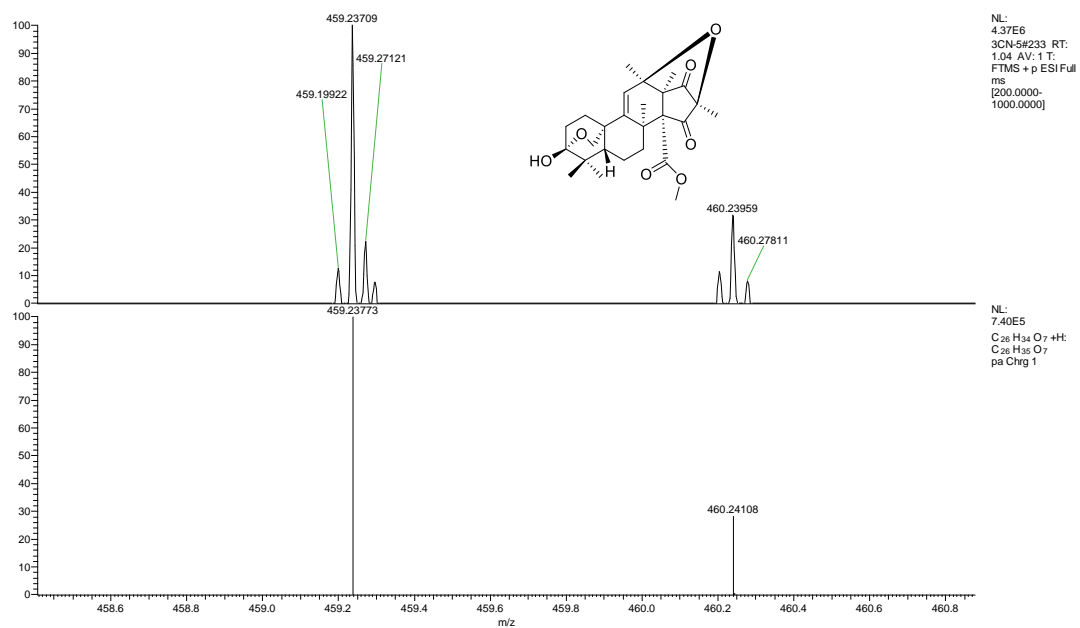

**Figure S1.** HRESIMS spectrum of compound **1**

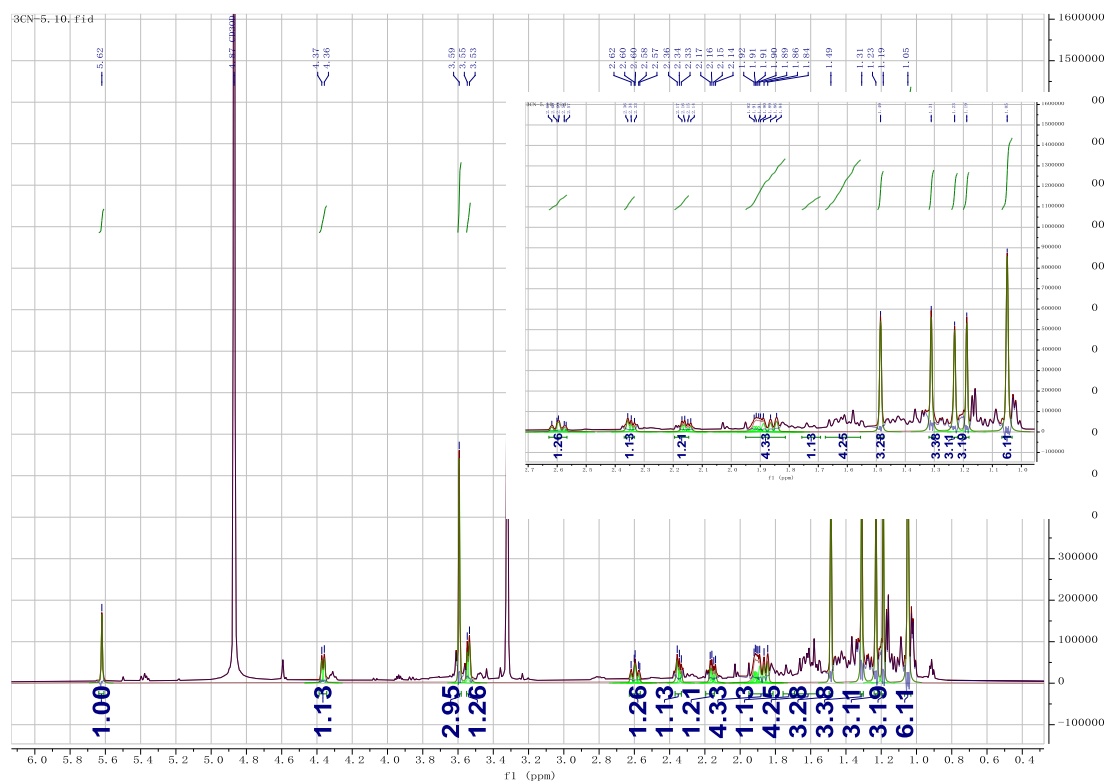

**Figure S2.**  $^1\text{H}$  NMR spectrum of compound **1** (600 MHz,  $\text{CD}_3\text{OD}$ )

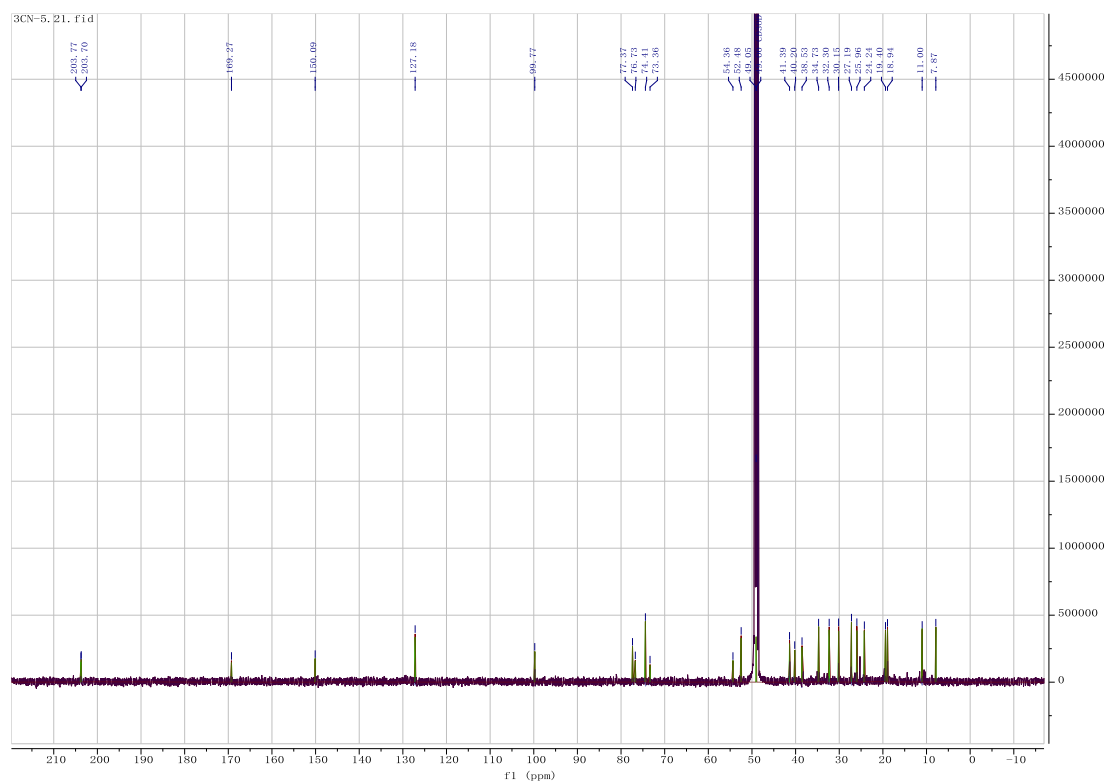

**Figure S3.**  $^{13}\text{C}$  NMR spectrum of compound **1** (150 MHz,  $\text{CD}_3\text{OD}$ )

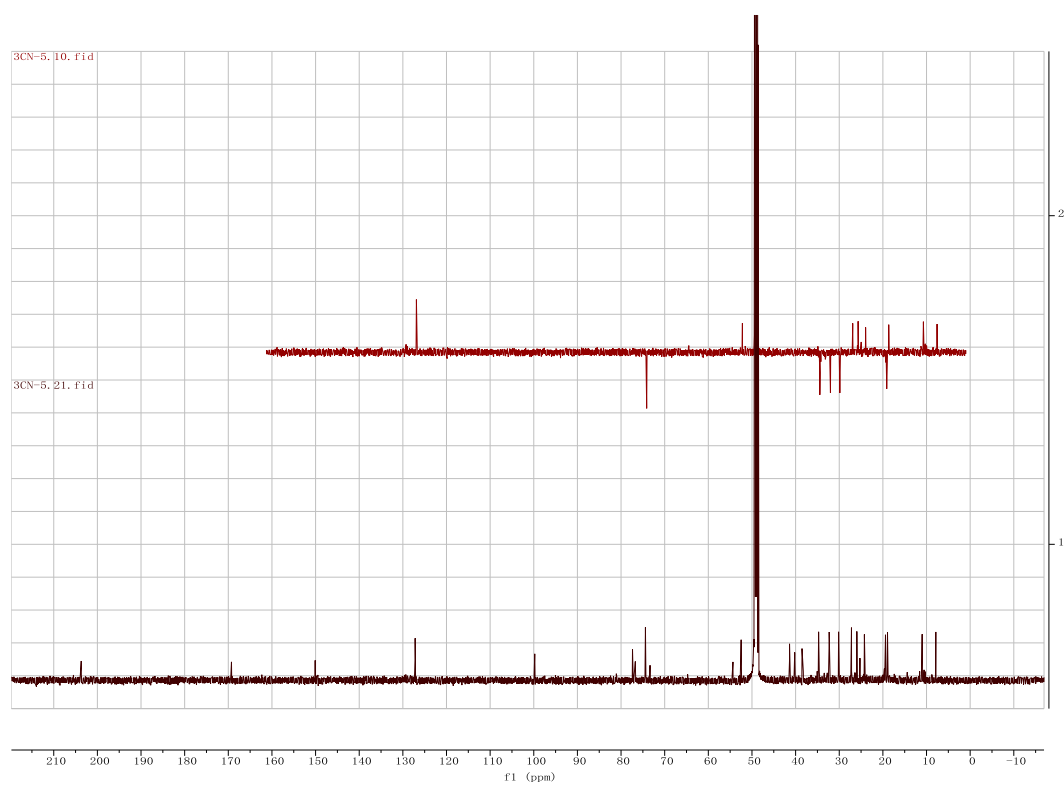

**Figure S4.** DEPT135 spectrum of compound **1** (150 MHz,  $\text{CD}_3\text{OD}$ )

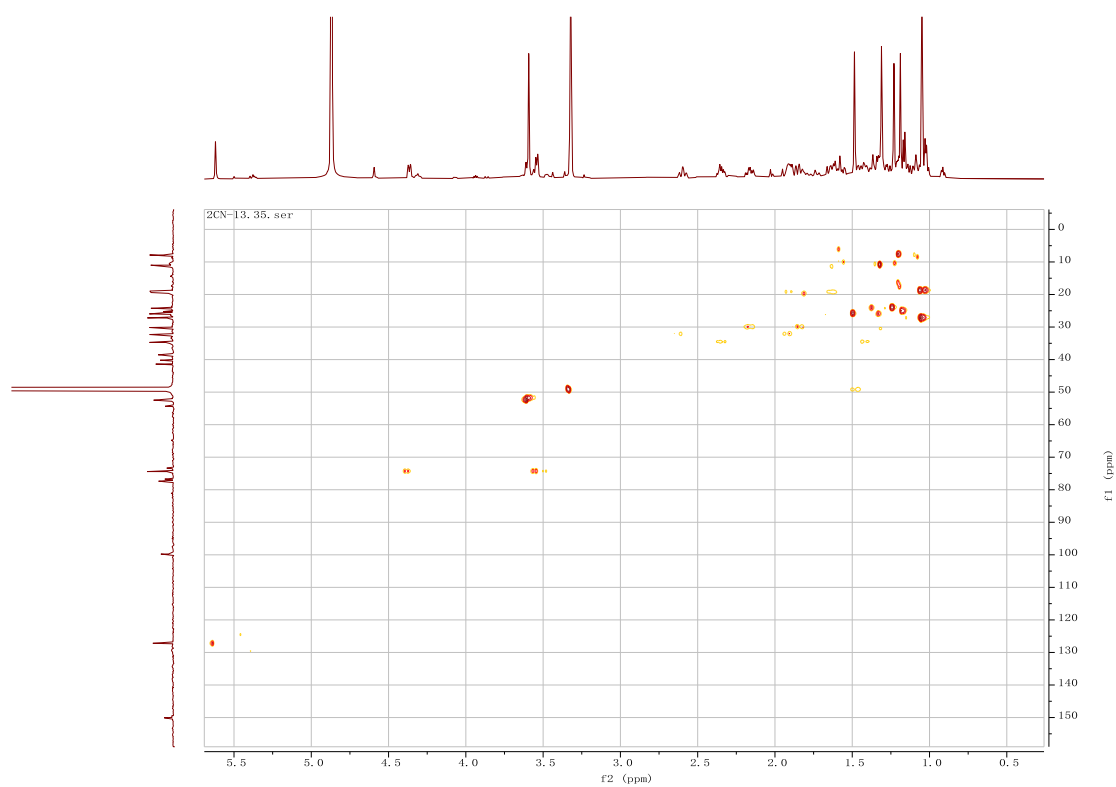

**Figure S5.** HSQC spectrum of compound **1** (CD<sub>3</sub>OD)

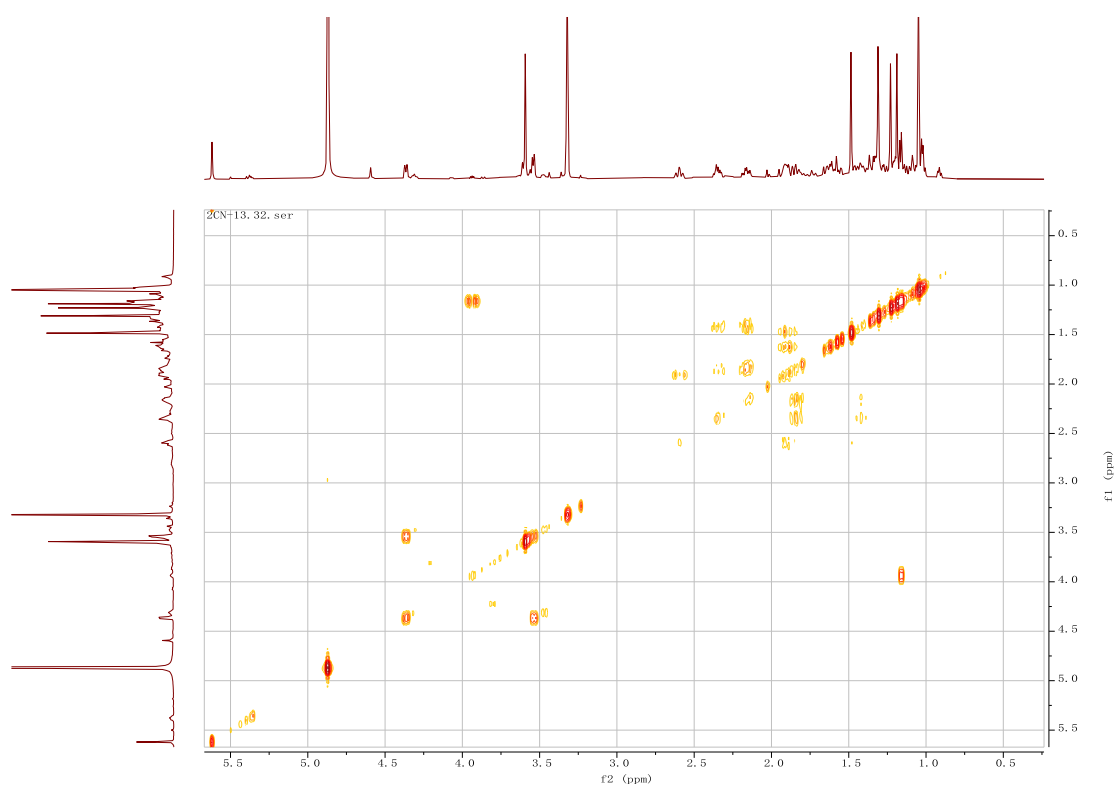

**Figure S6.** H, H-COSY spectrum of compound **1** (CD<sub>3</sub>OD)

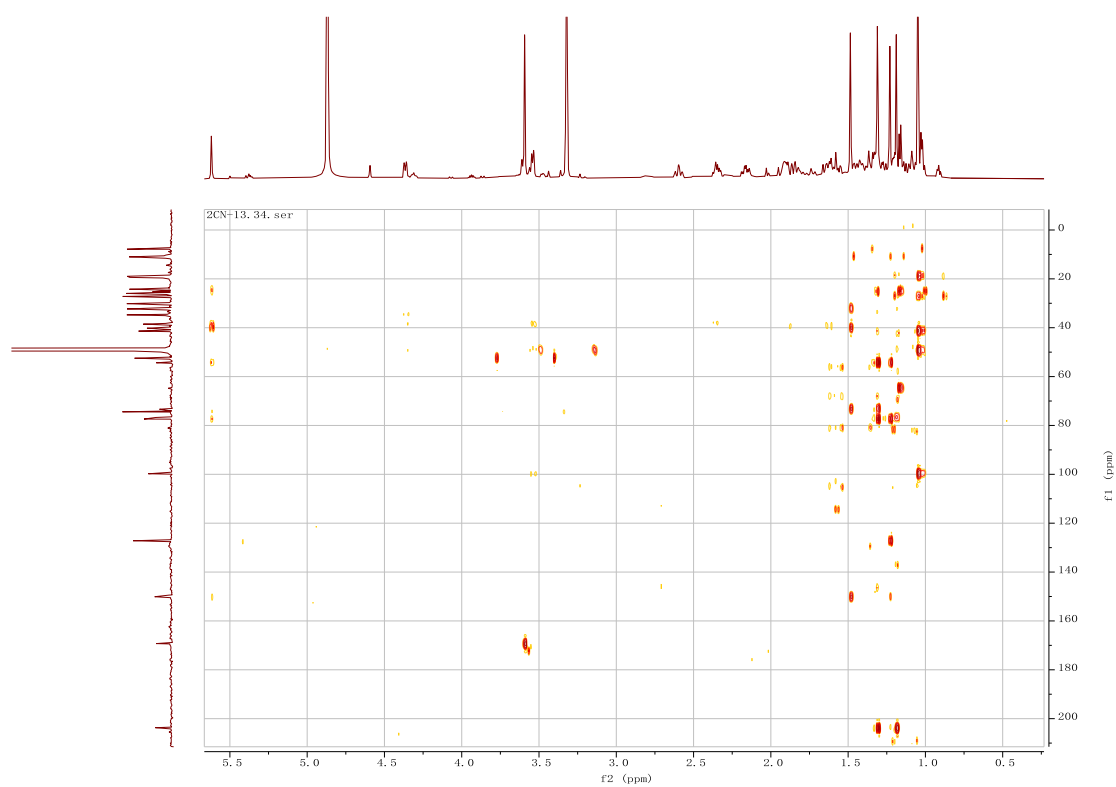

**Figure S7.** HMBC spectrum of compound **1** (CD<sub>3</sub>OD)

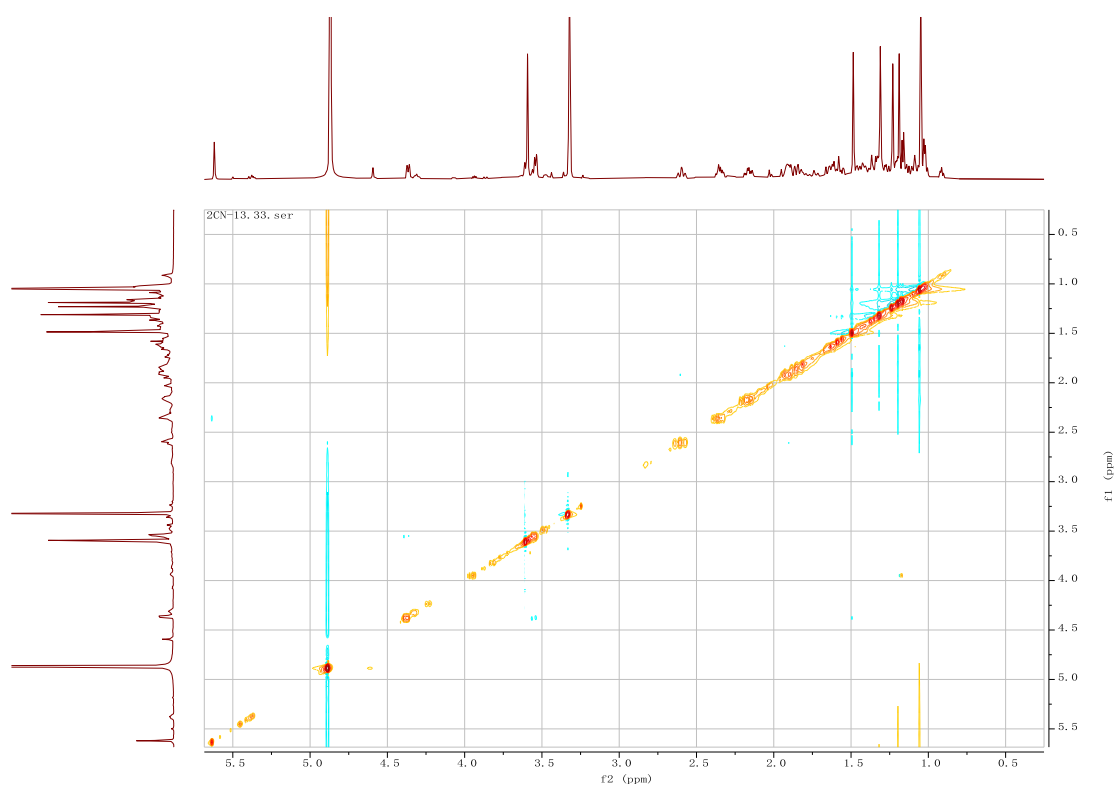

**Figure S8.** NOE spectrum of compound **1** (CD<sub>3</sub>OD)

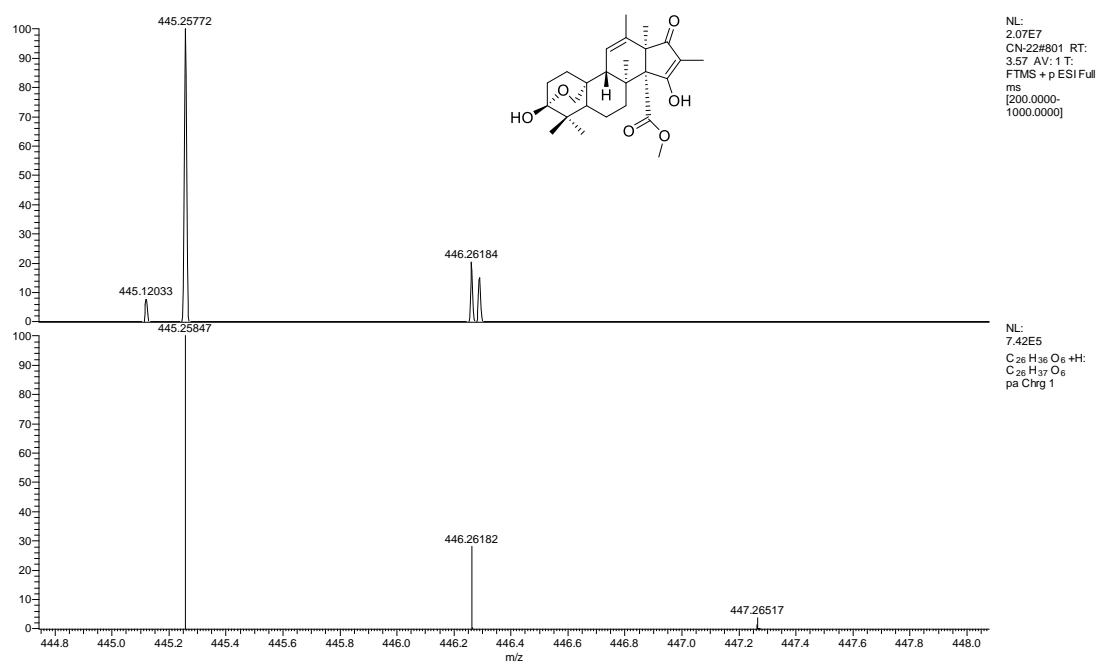

**Figure S9.** HRESIMS spectrum of compound **2**

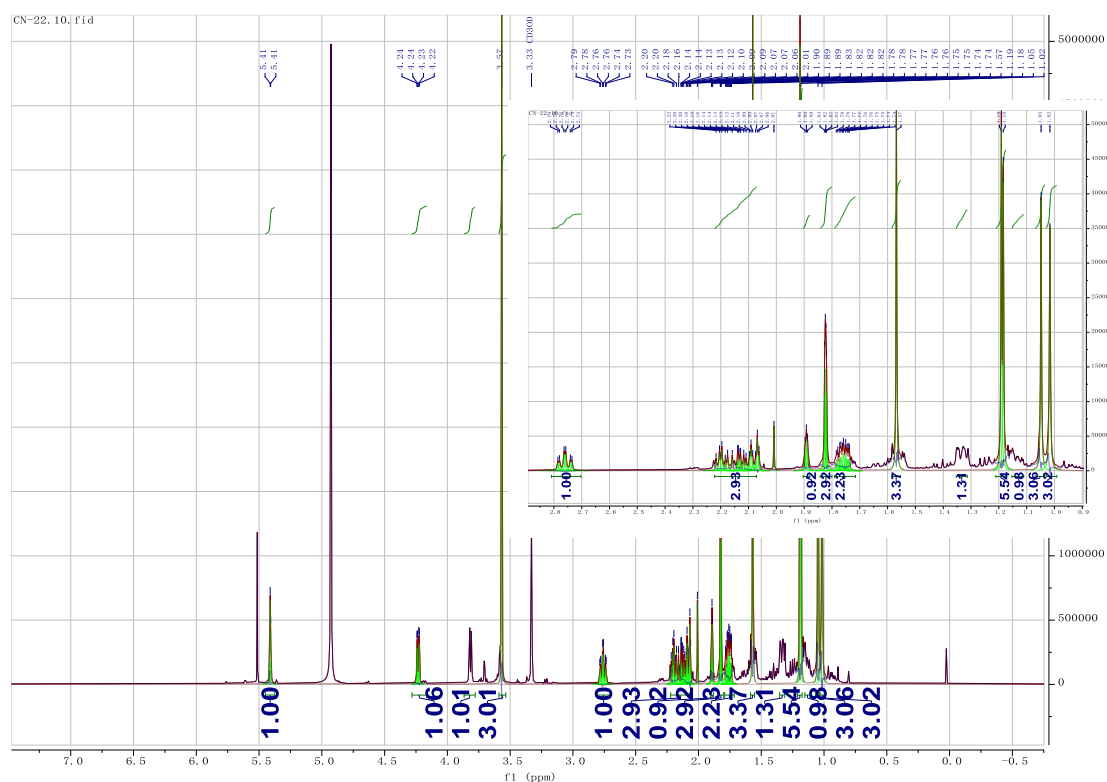

**Figure S10.** <sup>1</sup>H NMR spectrum of compound **2** (600 MHz, CD<sub>3</sub>OD)

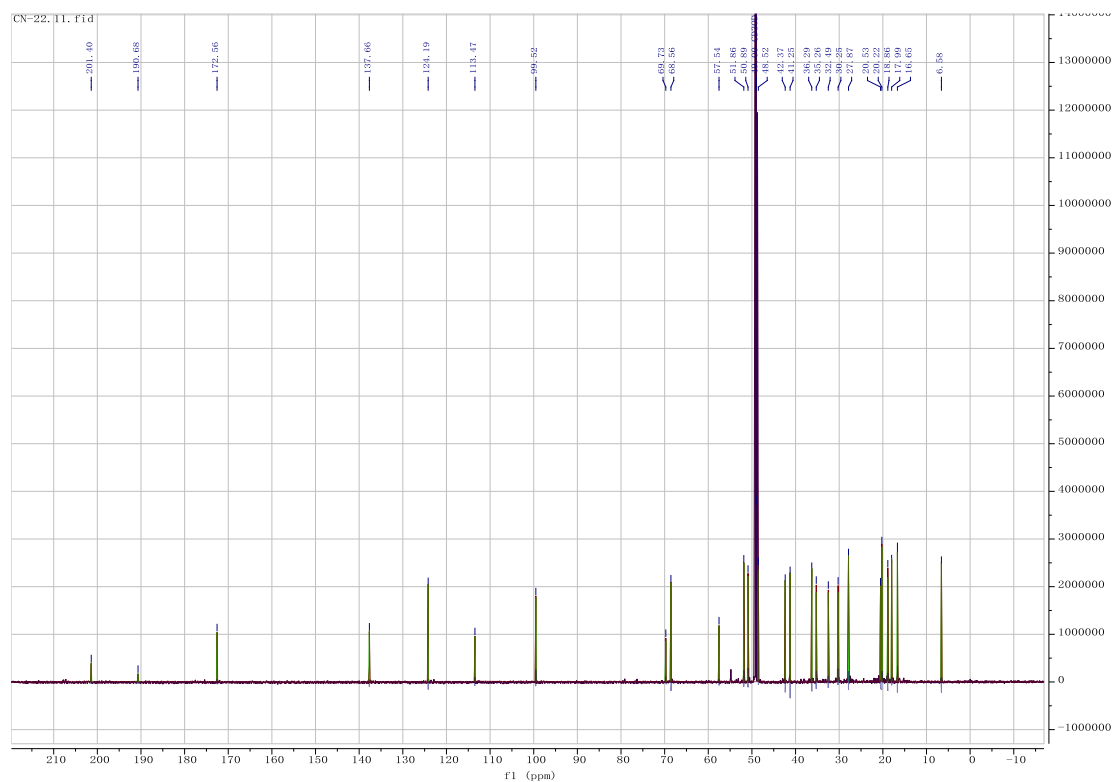

**Figure S11.**  $^{13}\text{C}$  NMR spectrum of compound **2** (150 MHz,  $\text{CD}_3\text{OD}$ )

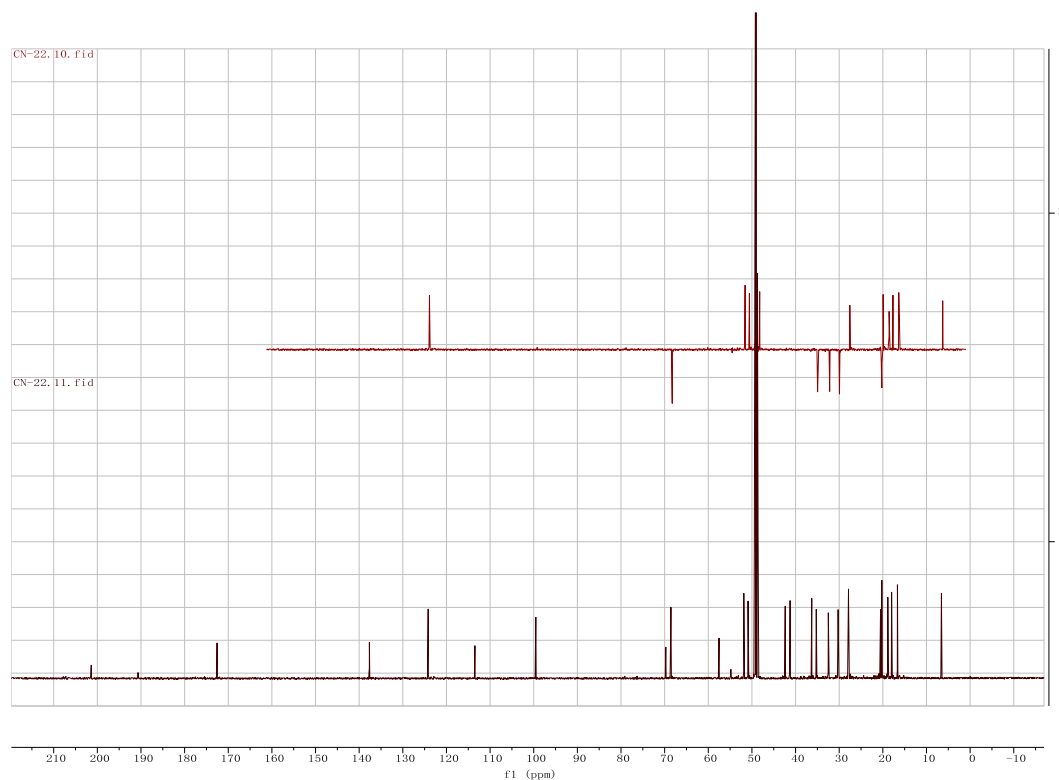

**Figure S12.** DEPT135 spectrum of compound **2** (150 MHz,  $\text{CD}_3\text{OD}$ )

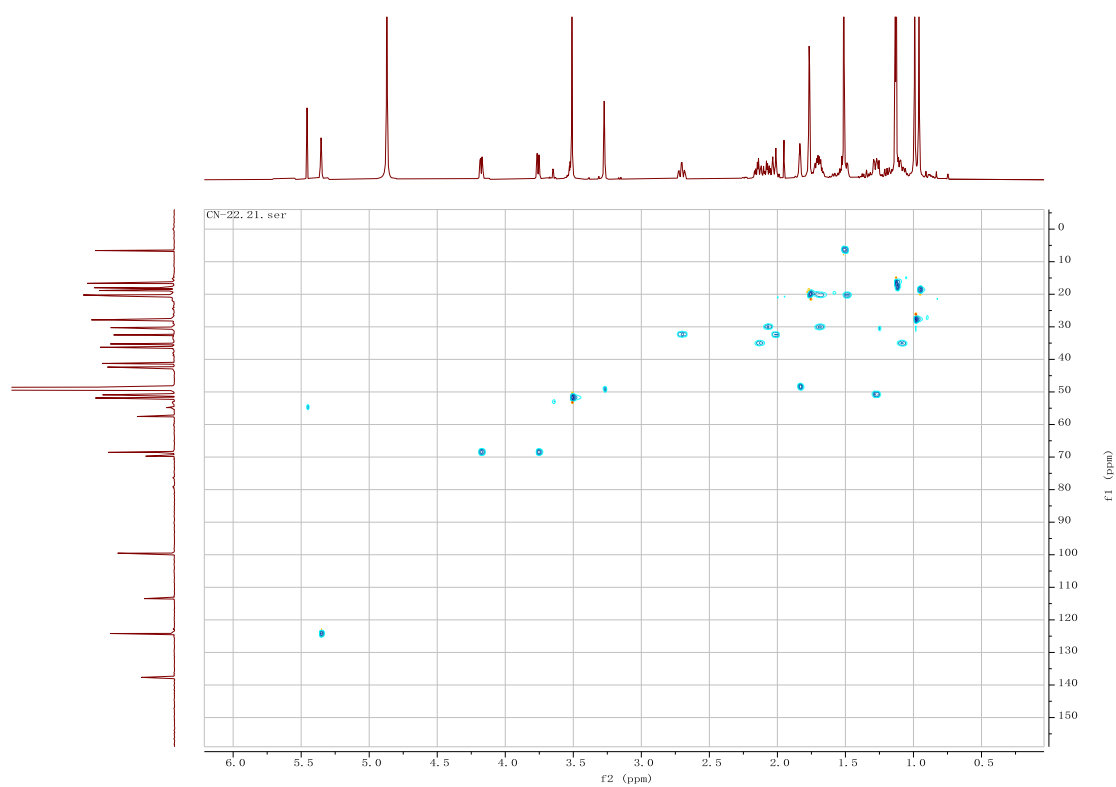

**Figure S13.** HSQC spectrum of compound **2** (CD<sub>3</sub>OD)

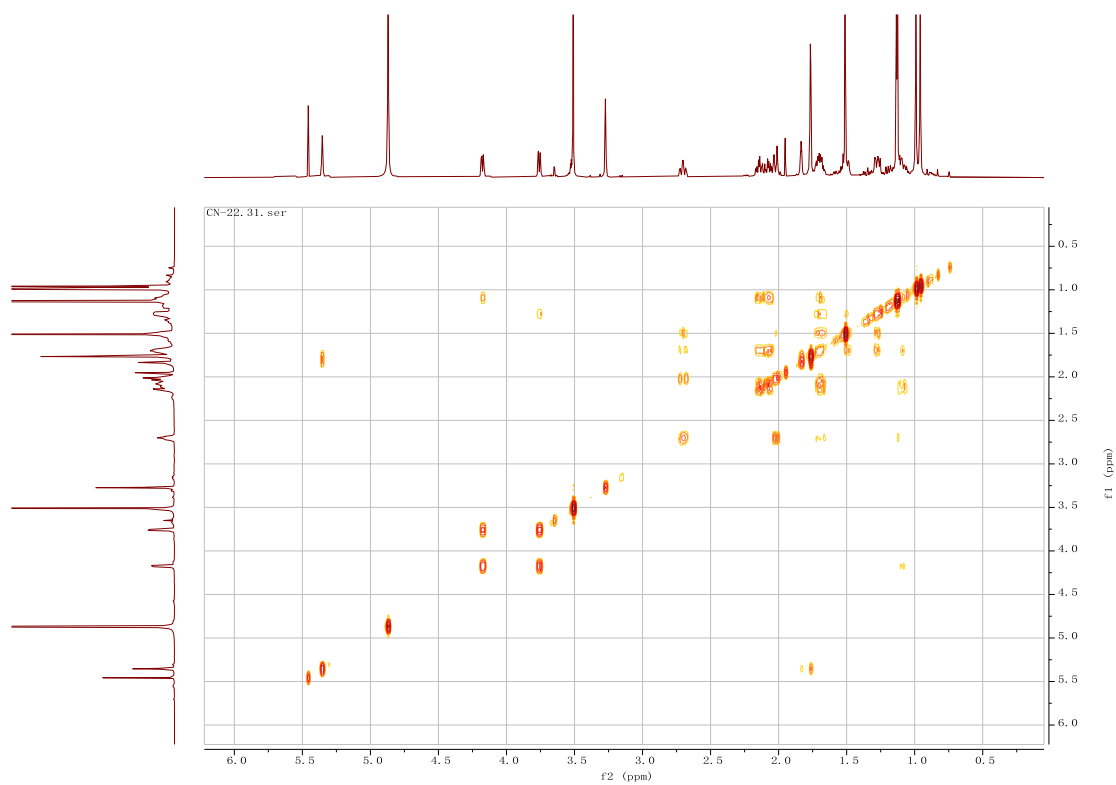

**Figure S14.** H, H-COSY spectrum of compound **2** (CD<sub>3</sub>OD)

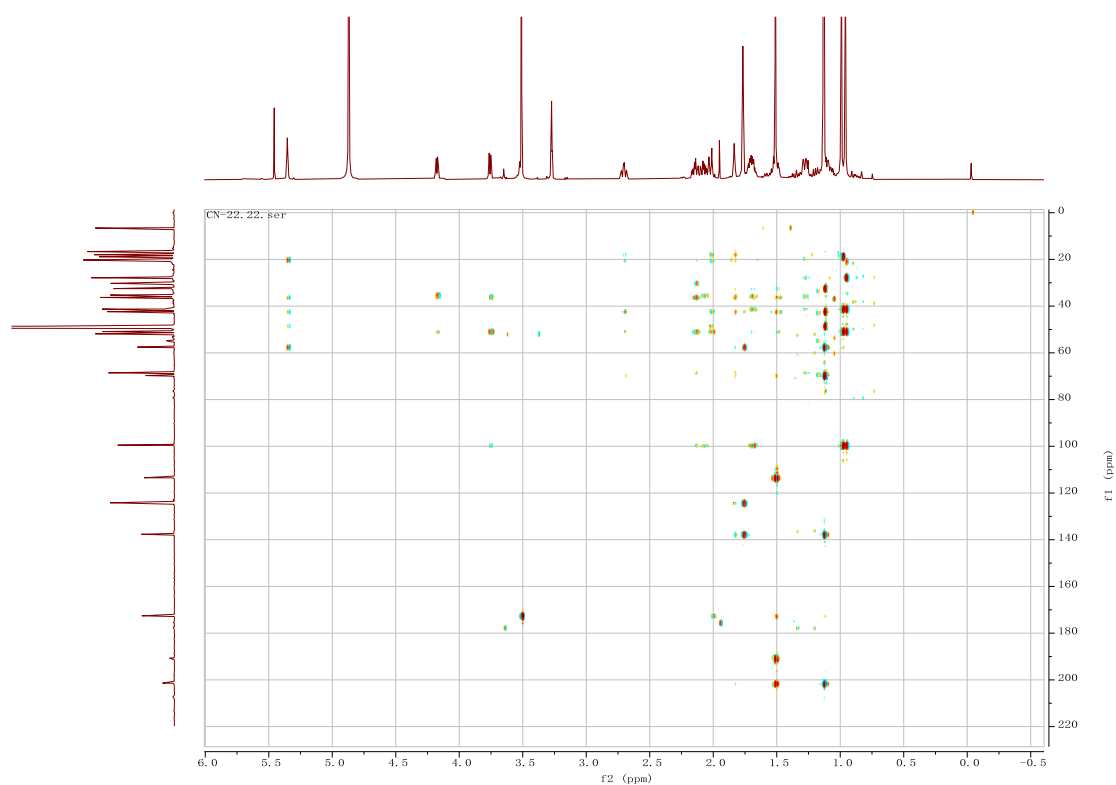

**Figure S15.** HMBC spectrum of compound **2** (CD<sub>3</sub>OD)

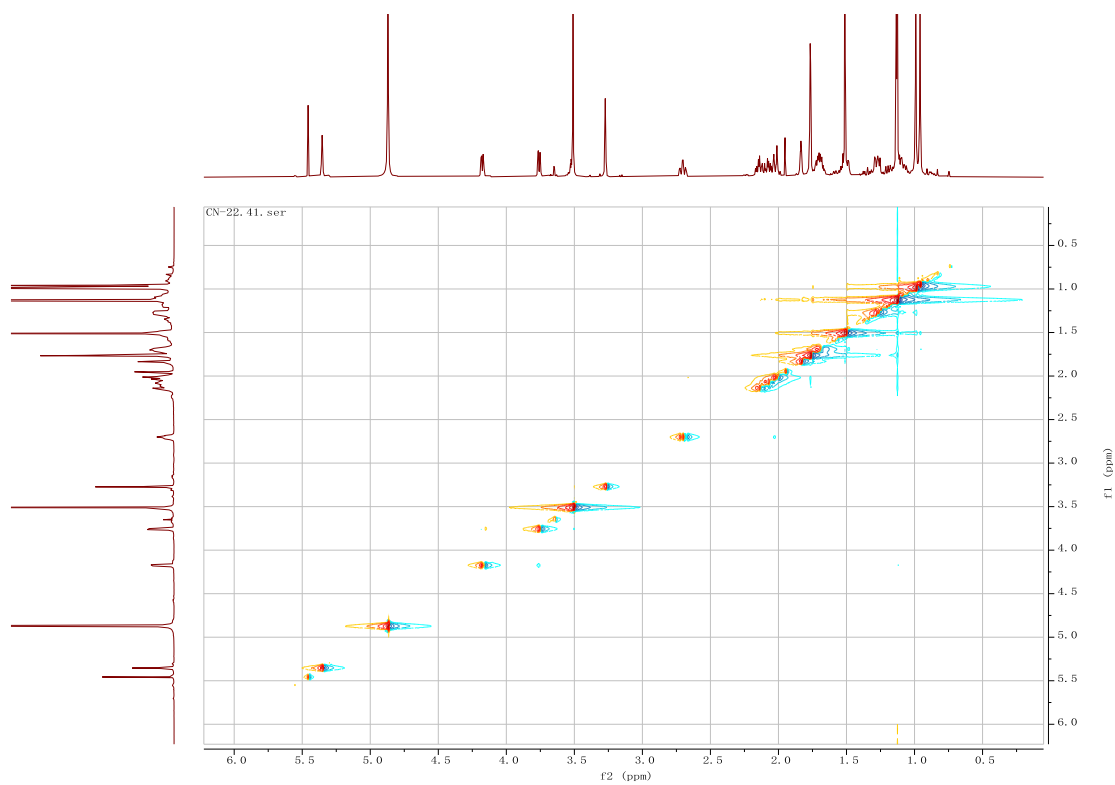

**Figure S16.** NOE spectrum of compound **2** (CD<sub>3</sub>OD)

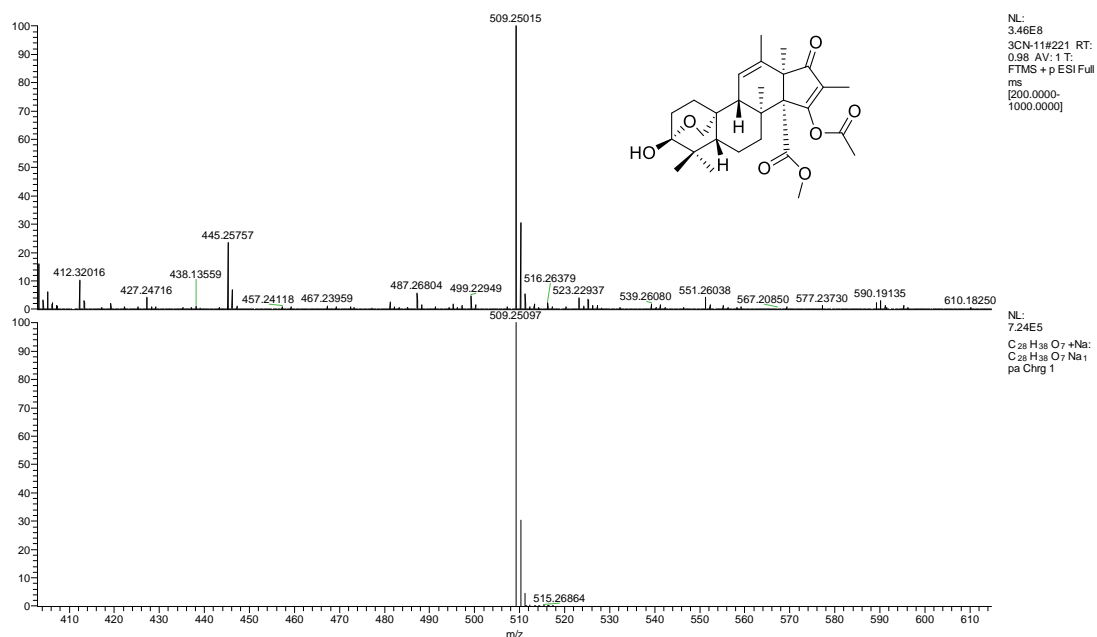

**Figure S17.** HRESIMS spectrum of compound **3**

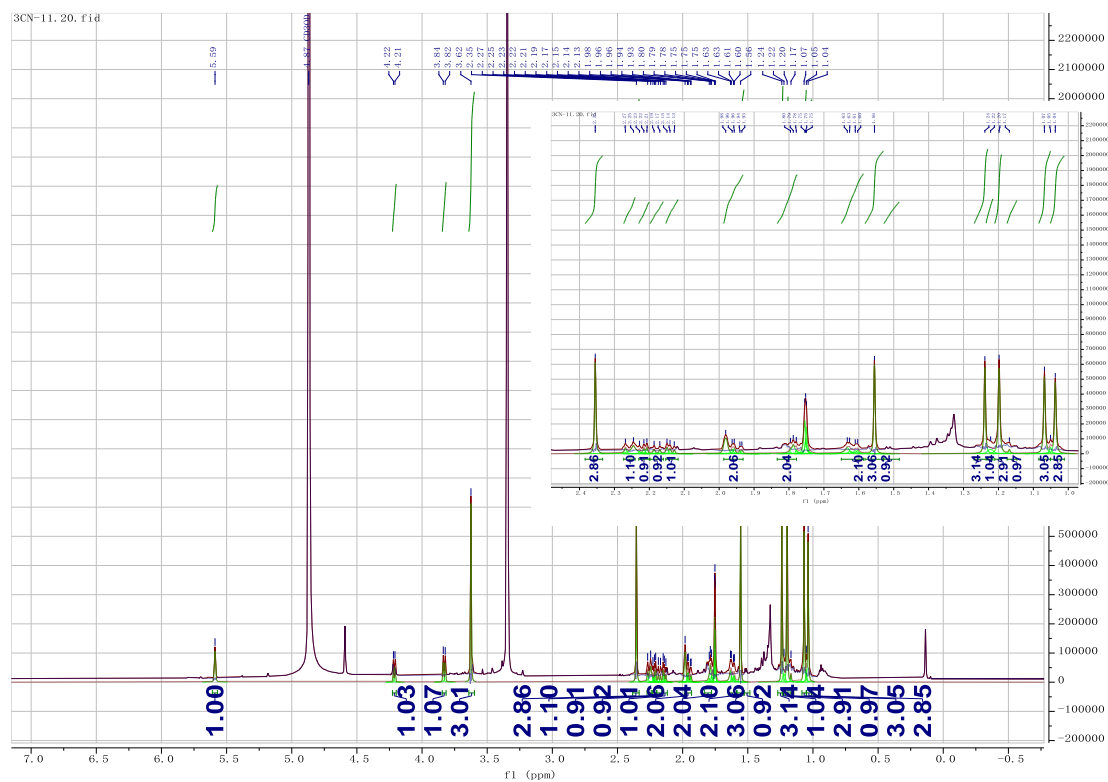

**Figure S18.** <sup>1</sup>H NMR spectrum of compound **3** (600 MHz, CD<sub>3</sub>OD)

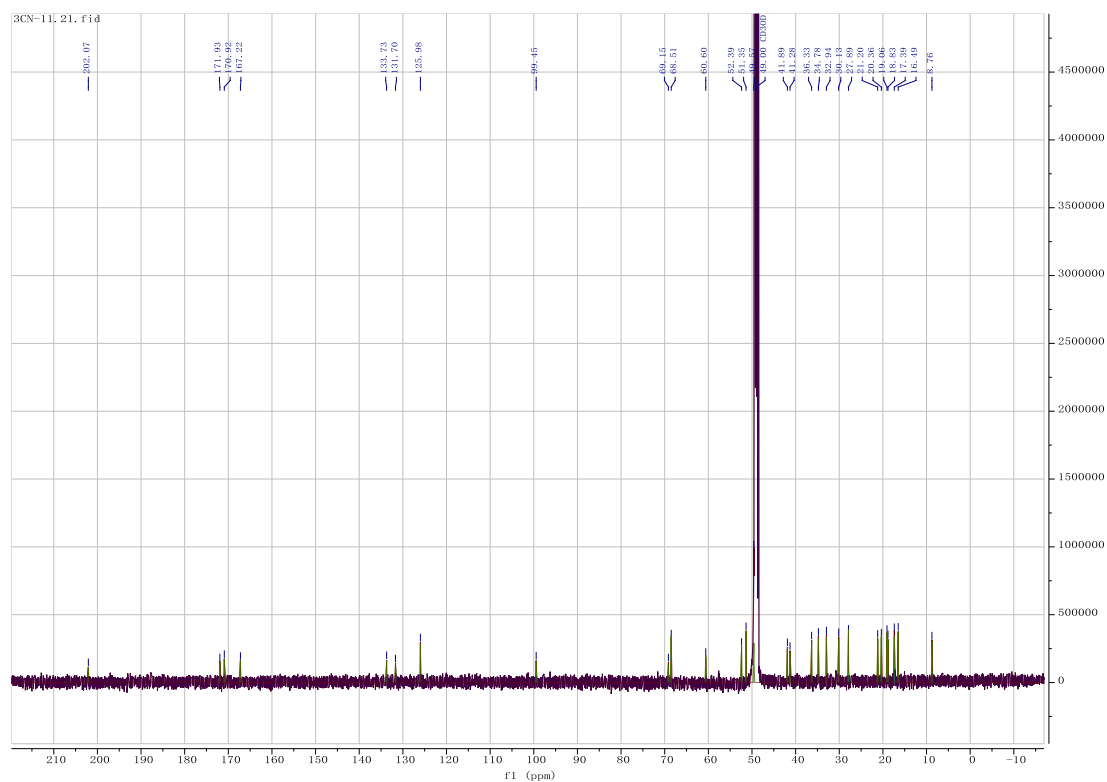

**Figure S19.**  $^{13}\text{C}$  NMR spectrum of compound **3** (150 MHz,  $\text{CD}_3\text{OD}$ )

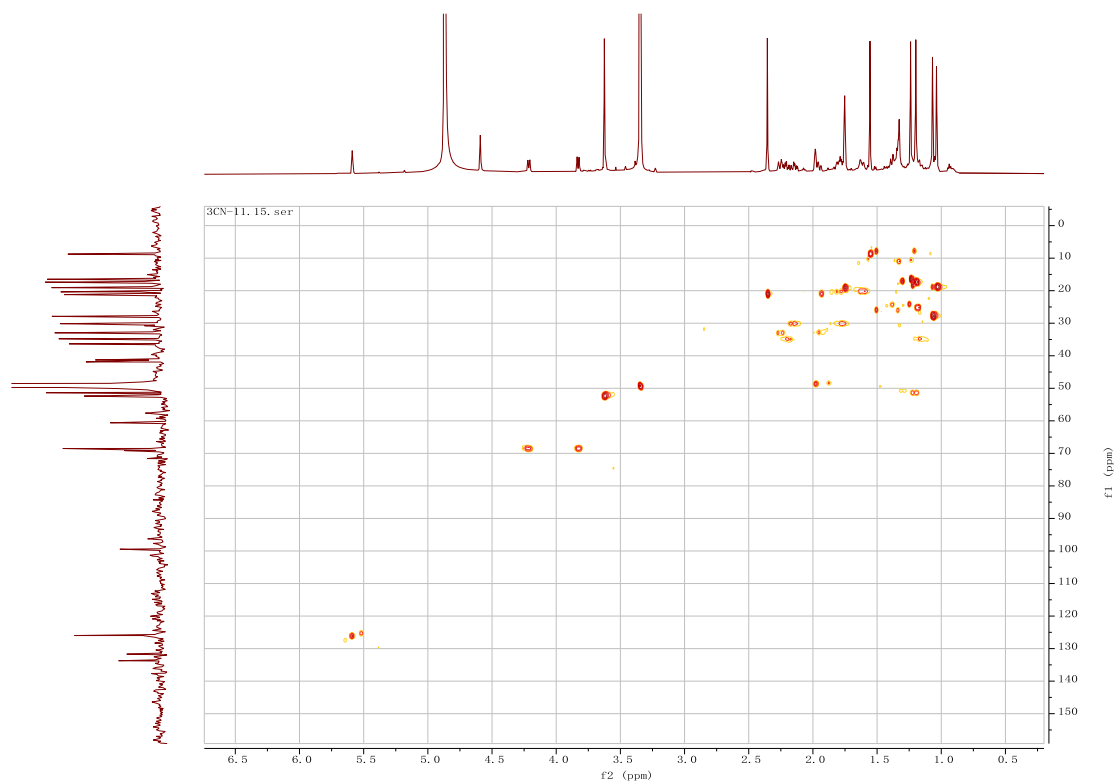

**Figure S20.** HSQC spectrum of compound **3** ( $\text{CD}_3\text{OD}$ )

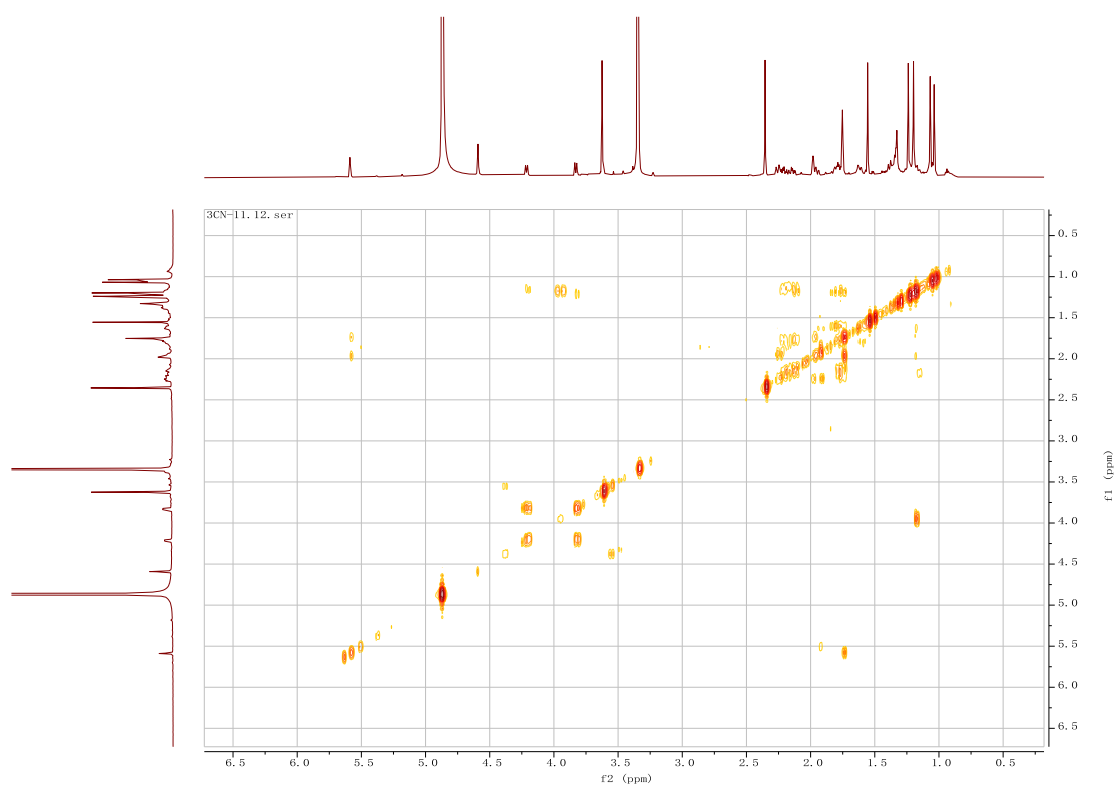

**Figure S21.** H, H-COSY spectrum of compound **3** (CD<sub>3</sub>OD)

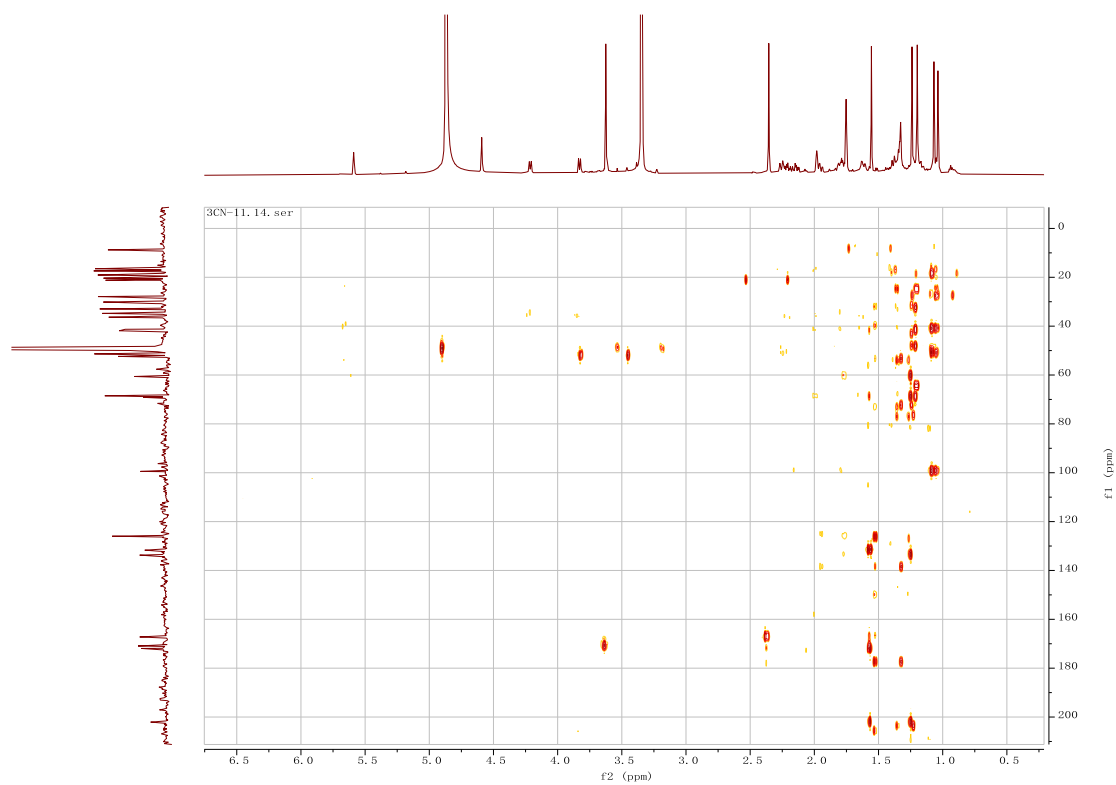

**Figure S22.** HMBC spectrum of compound **3** (CD<sub>3</sub>OD)

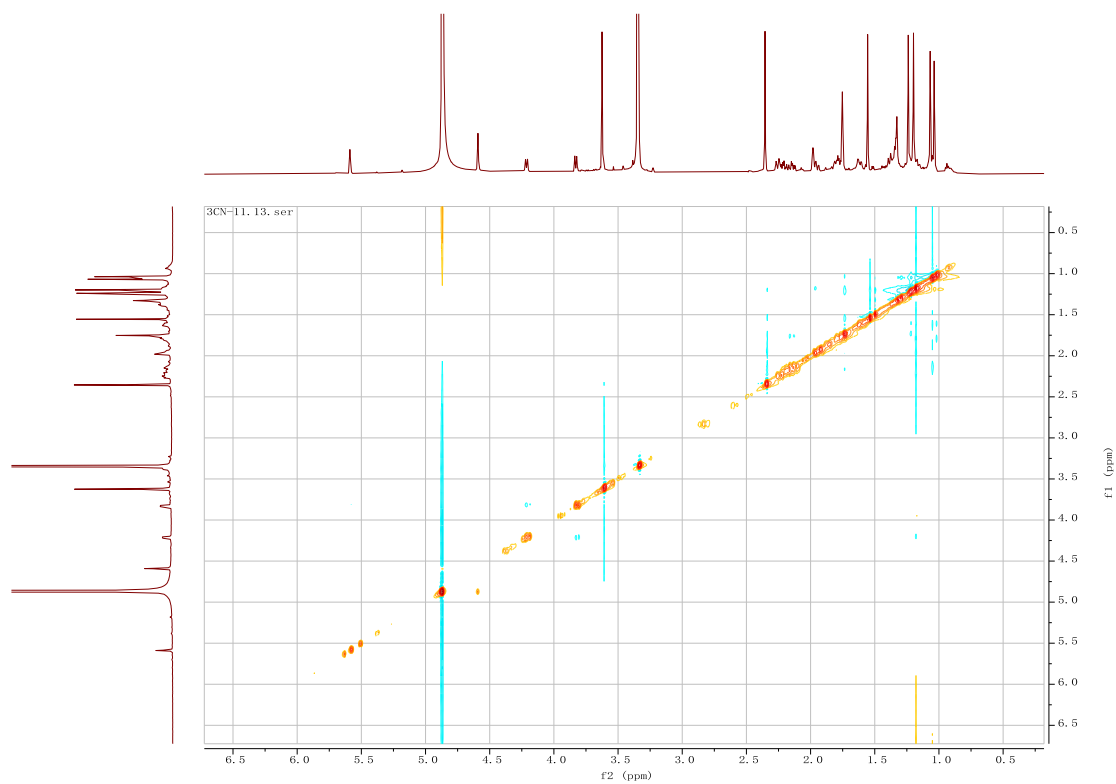

**Figure S23.** NOE spectrum of compound **3** (CD<sub>3</sub>OD)

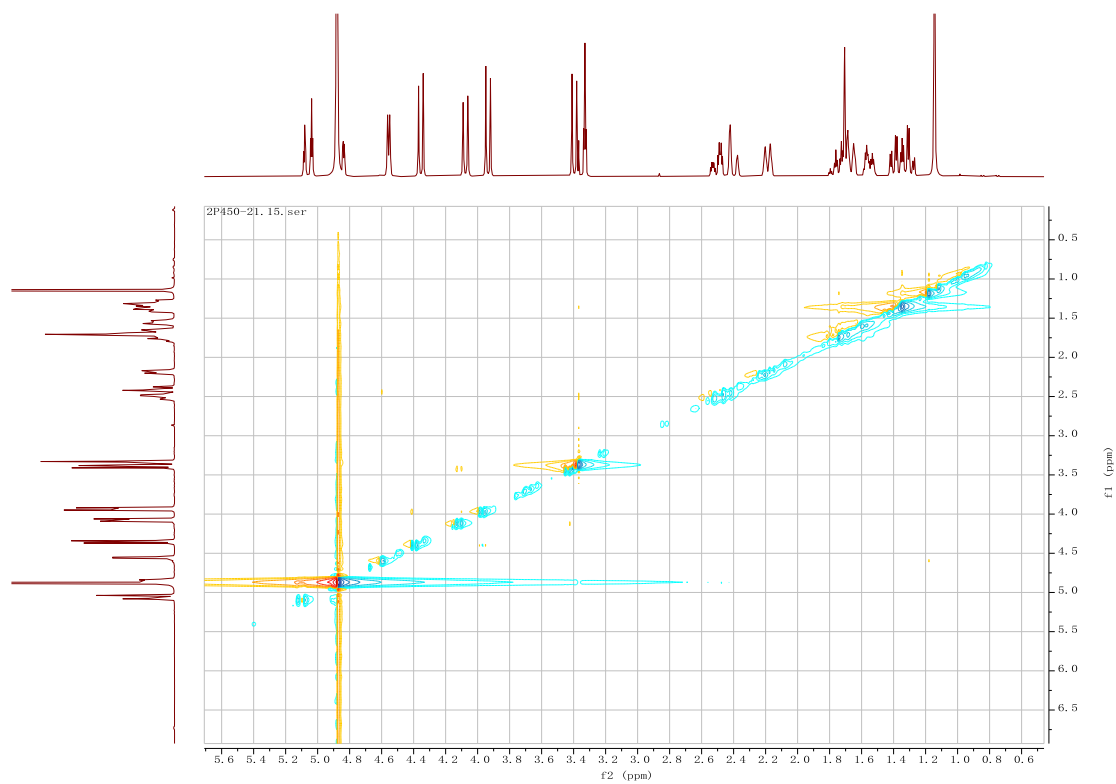

**Figure S24.** NOE spectrum of compound **14** (CD<sub>3</sub>OD)

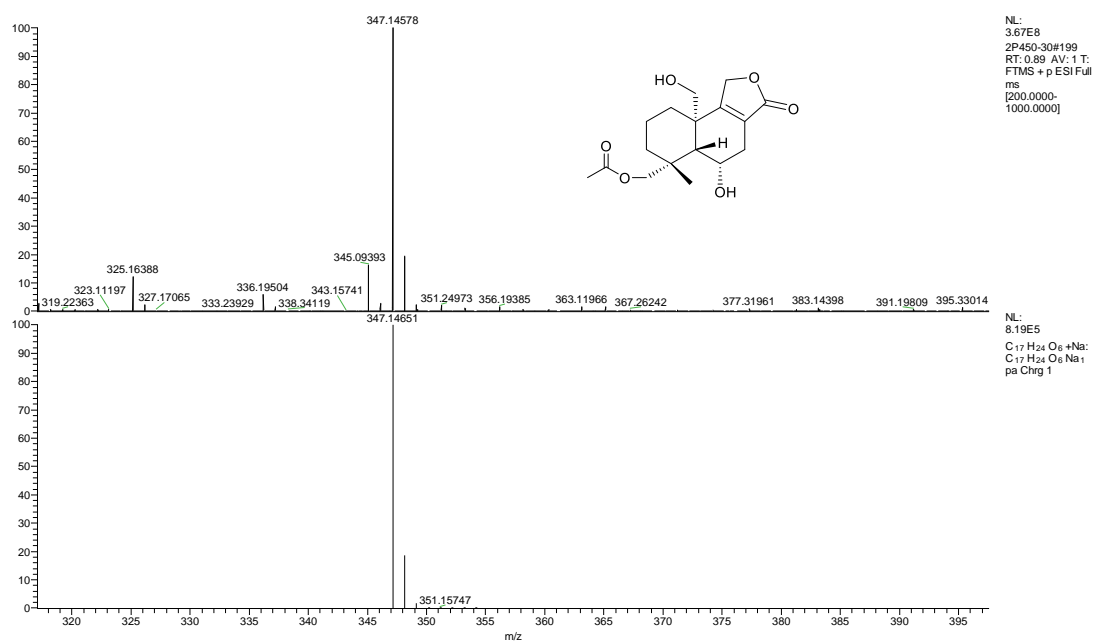

**Figure S25.** HRESIMS spectrum of compound **15**

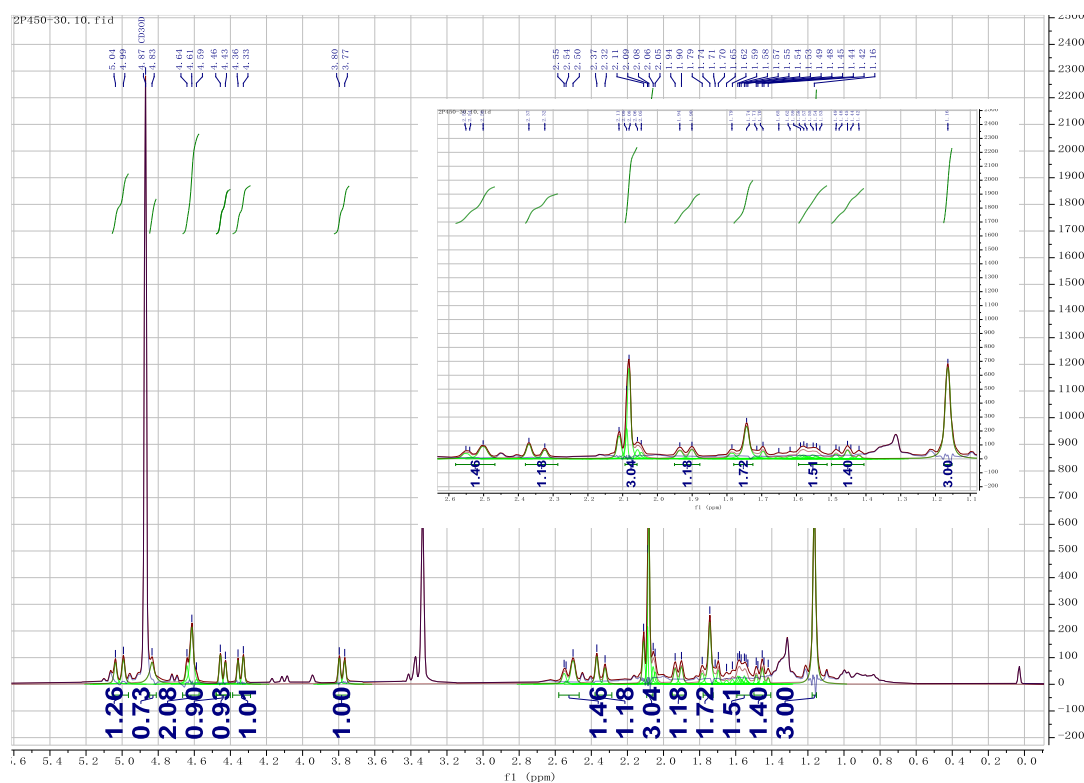

**Figure S26.** <sup>1</sup>H NMR spectrum of compound **15** (400 MHz, CD<sub>3</sub>OD)

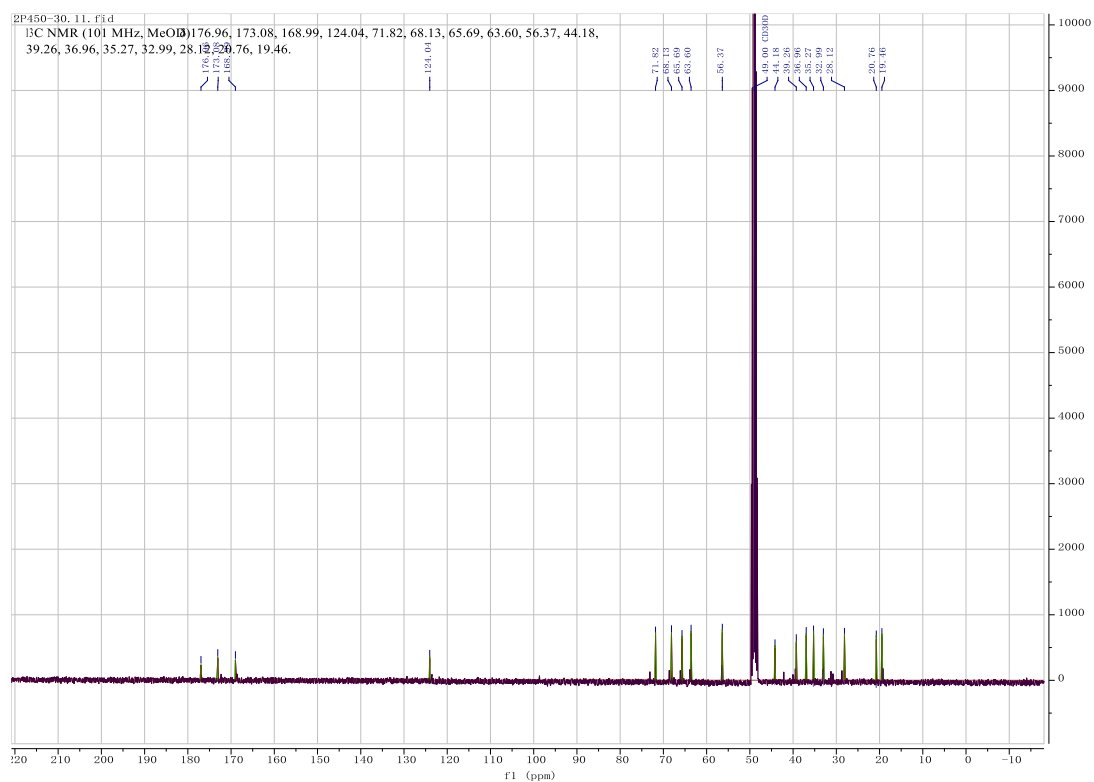

**Figure S27.**  $^{13}\text{C}$  NMR spectrum of compound **15** (100 MHz,  $\text{CD}_3\text{OD}$ )

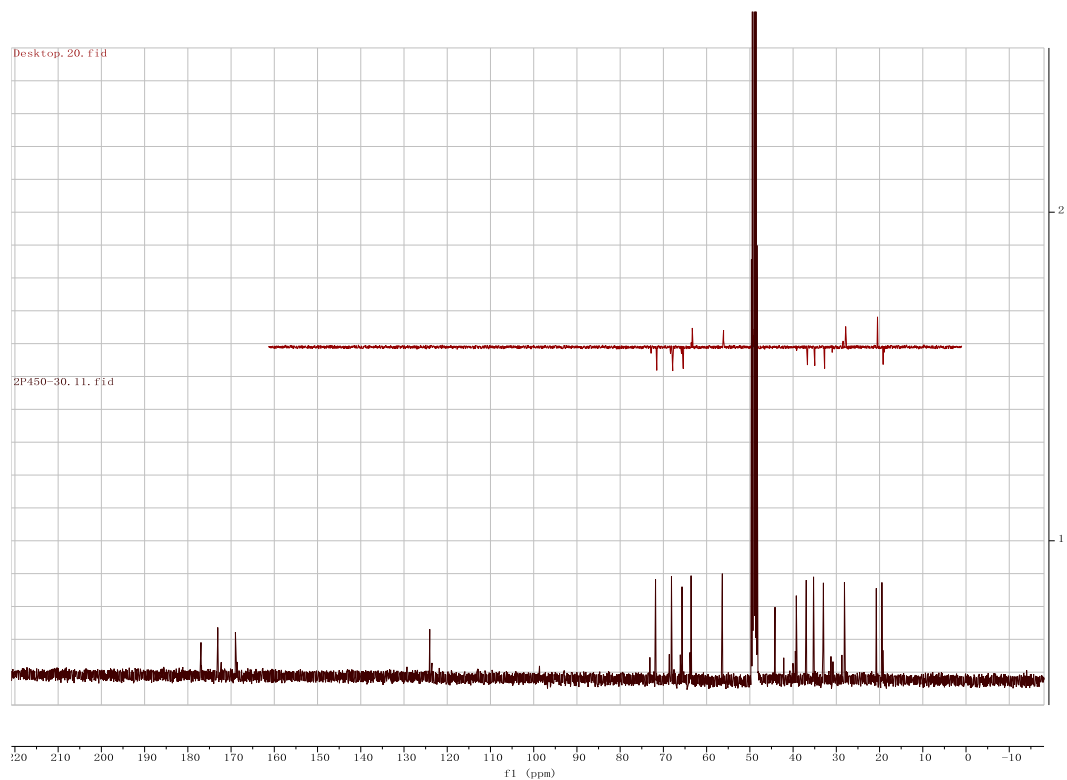

**Figure S28.** DEPT135 spectrum of compound **15** (150 MHz,  $\text{CD}_3\text{OD}$ )

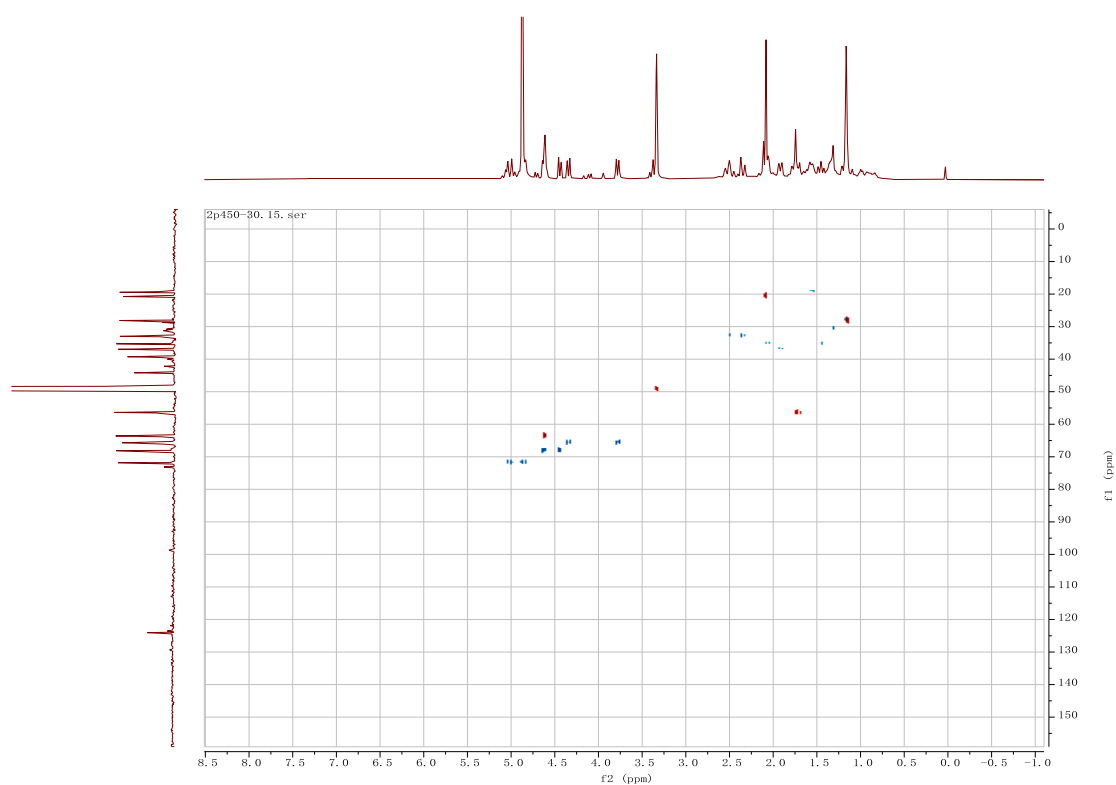

**Figure S29.** HSQC spectrum of compound **15** (CD<sub>3</sub>OD)

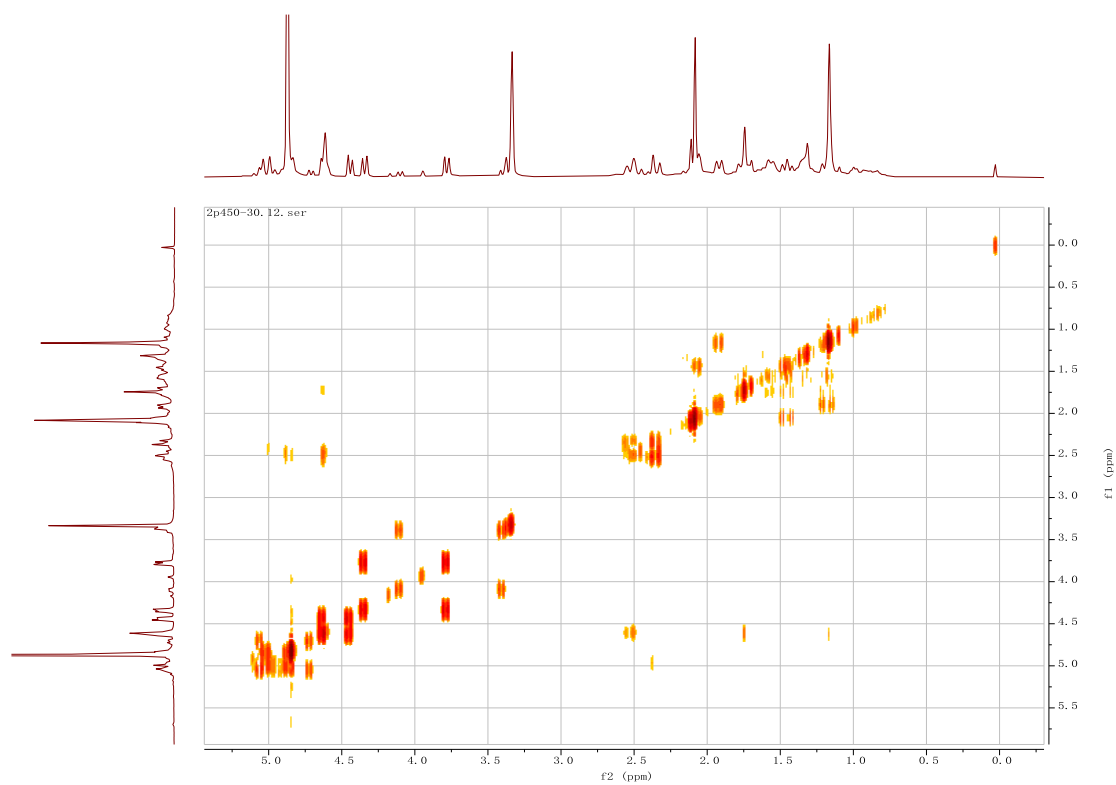

**Figure S30.** H, H-COSY spectrum of compound **15** (CD<sub>3</sub>OD)

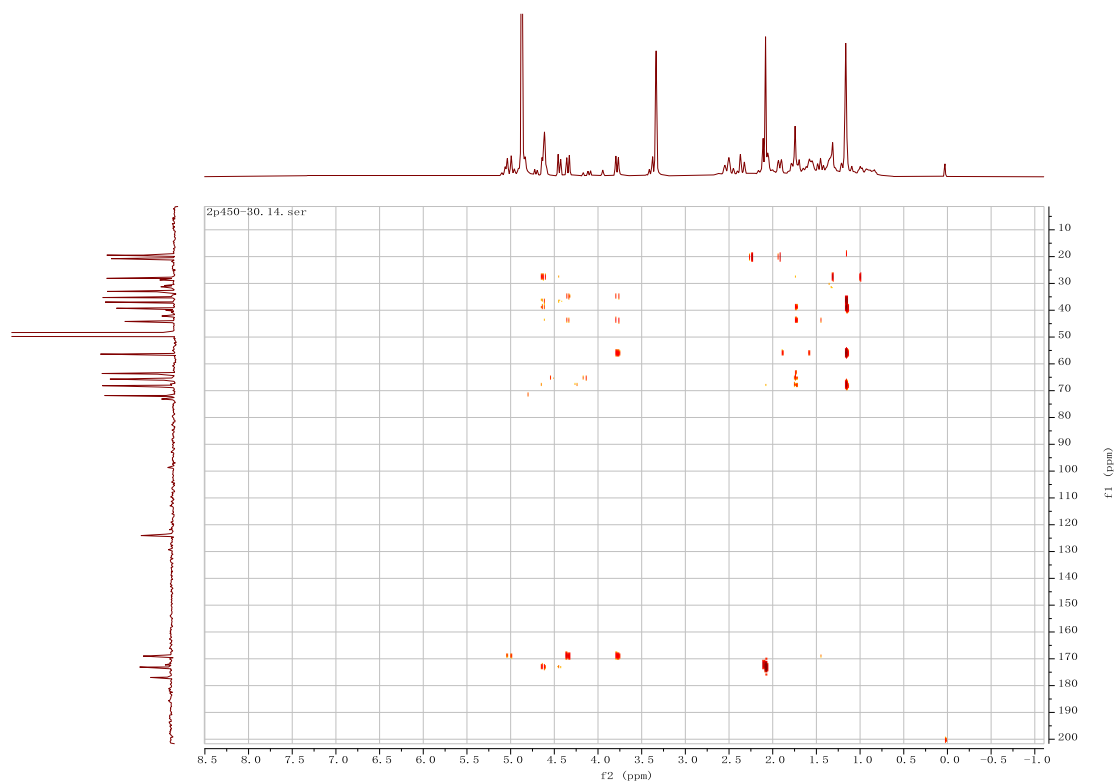

**Figure S31.** HMBC spectrum of compound **15** (CD<sub>3</sub>OD)

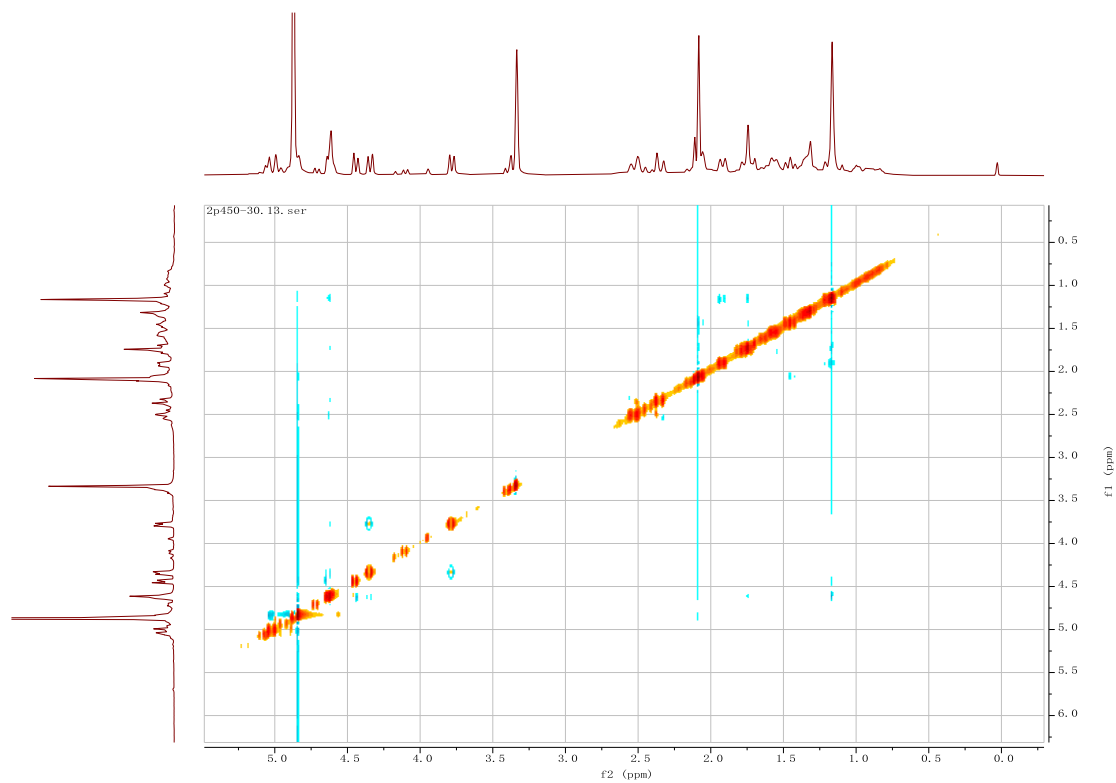

**Figure S32.** NOE spectrum of compound **15** (CD<sub>3</sub>OD)

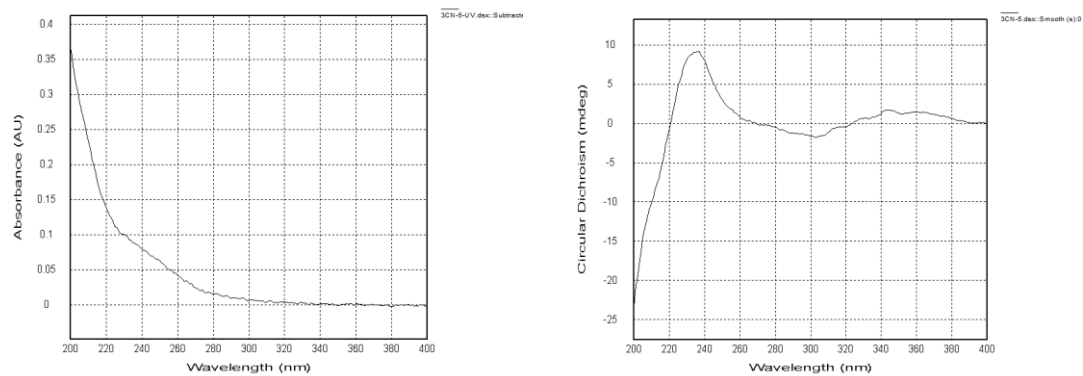

**Figure S33.** UV and ECD of compound **1** (CD<sub>3</sub>OD)

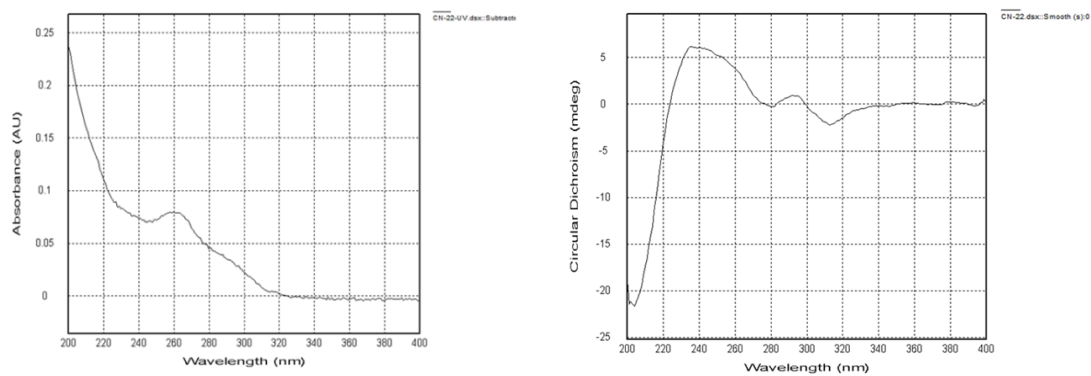

**Figure S34.** UV and ECD of compound **2** (CD<sub>3</sub>OD)

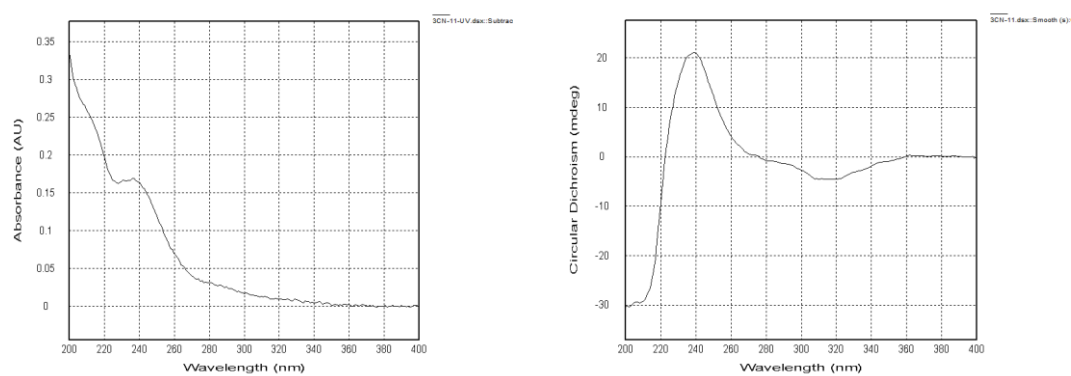

**Figure S35.** UV and ECD of compound **3** (CD<sub>3</sub>OD)

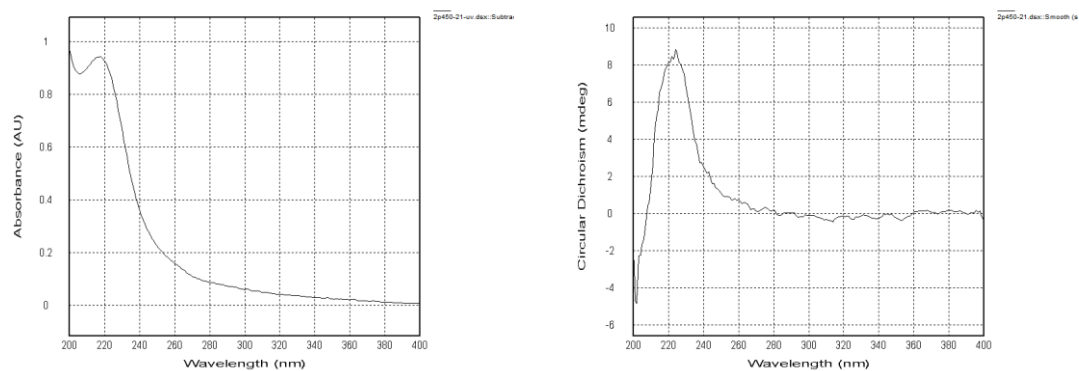

**Figure S36.** UV and ECD of compound **14** ( $\text{CD}_3\text{OD}$ )

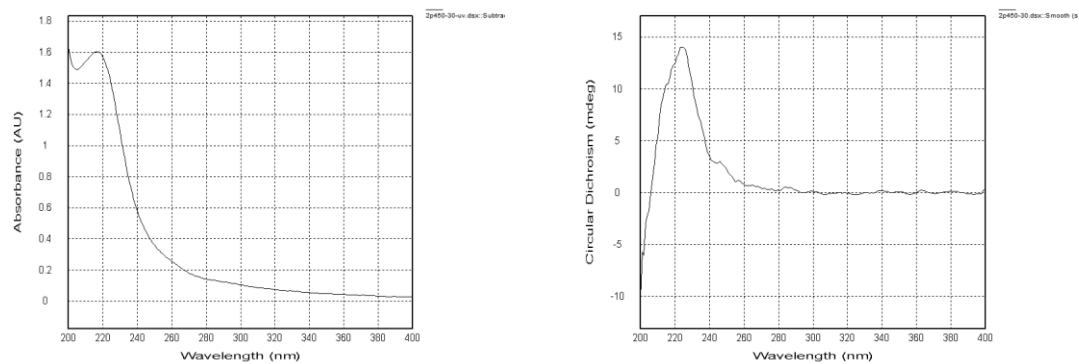

**Figure S37.** UV and ECD of compound **15** ( $\text{CD}_3\text{OD}$ )
